1 Title: **The contribution of PIP2-type aquaporins to photosynthesis in response to increased**  
2 **vapour pressure deficit**

3

4 Short title: **PIP2-type aquaporins contribute to photosynthesis**

5

6 Authors: D. Israel<sup>1)</sup>, S. Khan<sup>2)</sup>, C.R. Warren<sup>3)</sup>, J.J. Zwiazek<sup>2)</sup>\*, T.M. Robson<sup>1)</sup>\*,

7

8 Author Affiliations: 1) Organismal and Evolutionary Biology (OEB), Viikki Plant Science Centre  
9 (ViPS), University of Helsinki, Finland; 2) Department of Renewable Resources, University of  
10 Alberta, Canada; 3) School of Life and Environmental Sciences, University of Sydney, Australia.

11 \* Equal senior author contribution

12

### 13 **One-sentence summary**

14 Plasma membrane aquaporin *AtPIP2;5* is permeable to CO<sub>2</sub> and contributes to mesophyll  
15 conductance of CO<sub>2</sub> in leaves, whereas *AtPIP2;4* is a regulator of stomatal conductance.

16

### 17 **Author contributions**

18 D.I., C.R.W. and T.M.R. designed the experiment; C.R.W., T.M.R. and J.J.Z. supervised the  
19 research; D.I. performed all experiments except stopped flow measurements, stopped flow  
20 measurements were performed by S.K.; C.R.W. and T.M.R. provided technical assistance to D.I.;  
21 D.I. analysed the data; D.I. wrote the article with contributions from all authors; T.M.R. is the  
22 corresponding author.

23

### 24 **ORCID**

25 D. Israel 0000-0003-2940-0617

26 S. Khan 0000-0003-1864-9548

27 C.R. Warren 0000-0002-0788-4713

28 J.J. Zwiazek 0000-0003-2784-5508

29 T.M. Robson 0000-0002-8631-796X

30

### 31 **Corresponding Author**

32 T.M. Robson, [matthew.robson@helsinki.fi](mailto:matthew.robson@helsinki.fi)

33

34

35

## 36 **Abstract**

37 Roles of three different plasma membrane aquaporins (PIPs) in leaf-level gas exchange of  
38 *Arabidopsis thaliana* were examined using single, double and triple knockout mutants and  
39 compared to the Columbia-0 wild type (WT) plants. Since multiple *Arabidopsis* PIPs are implicated  
40 in conducting carbon dioxide across membranes, we focused on identifying whether the examined  
41 isoforms affect photosynthesis, either mediated through the control of stomatal conductance to  
42 water vapour ( $g_s$ ) or mesophyll conductance of CO<sub>2</sub> ( $g_m$ ) or a combination of both. In two separate  
43 studies, we grew *Arabidopsis* plants in a low humidity environment and under high humidity  
44 conditions. We found that the contribution of functional PIPs to  $g_s$  was larger under conditions of  
45 low air humidity when the evaporative demand was high, whereas any effect of lacking PIP  
46 function was minimal under higher humidity conditions. The *pip2;4* knockout mutants had 44%  
47 higher  $g_s$  than the WT under low humidity conditions, which in turn resulted in an increased  
48 photosynthetic rate ( $A_{net}$ ). *AtPIP2;4* is thus likely to be involved in maintaining a positive water  
49 balance and high water use efficiency through mediation of transmembrane water flow. The lack of  
50 functional *AtPIP2;5* on the other hand did not affect  $g_s$ , but reduced  $g_m$  indicating a possible role in  
51 regulating CO<sub>2</sub> membrane permeability. This potential regulatory function was indeed confirmed by  
52 subsequent stopped flow measurements of yeast expressing *AtPIP2;5*.

53

54 Key Words: Aquaporin, PIP, *Arabidopsis*, CO<sub>2</sub>, Photosynthesis, Stomatal conductance, Mesophyll  
55 conductance

56

## 57 **Introduction**

58 Water flow across membranes, and thus through the plant, is regulated by aquaporins, which in  
59 addition to water may also conduct small neutral molecules and gasses including CO<sub>2</sub> and O<sub>2</sub> (Agre  
60 et al., 1993; Heckwolf et al., 2011; Zwiazek et al., 2017). *Arabidopsis thaliana* possesses 35  
61 different aquaporin isoforms that are divided into four subfamilies (Johanson et al., 2001): plasma  
62 membrane intrinsic proteins (PIPs) located in the plasma membrane (Daniels et al., 1994;  
63 Kammerloher et al., 1994; Kaldenhoff et al., 1995; Hachez et al., 2014), tonoplast intrinsic proteins  
64 (TIPs) localised to the tonoplast (Maurel et al., 1993; Beebo et al., 2009), Nodulin26-like intrinsic  
65 proteins (NIPs) with various membrane locations (Mizutani et al., 2006; Choi and Roberts, 2007),  
66 and small basic intrinsic proteins (SIPs) that are found in the membranes of the endoplasmic  
67 reticulum (Ishikawa et al., 2005). PIPs have been shown to be involved in a variety of processes  
68 regulating plant water flow starting from the root through the stem as well as into and out of the

69 leaves (Javot et al., 2003; Fraysse et al., 2005; Da Ines, 2010; Ben Baaziz et al., 2012; Gambetta et  
70 al., 2013). Based on their phylogeny, PIPs are further divided into two subgroups, the PIP1s and  
71 PIP2s, with five and eight isoforms respectively (Johanson et al., 2001). Water-permeability varies  
72 between the isoforms (Kammerloher et al., 1994; Kaldenhoff et al., 1995; Kaldenhoff et al., 1998;  
73 Chaumont et al., 2000; Li et al., 2015) and in fact, PIP1s are believed to transport water only when  
74 part of the heterotetramer structure with PIP2s (Fetter et al., 2004; Zelazny et al., 2007; Otto et al.,  
75 2010).

76 Standard greenhouse conditions for plant research provide ample light, water, nutrients and  
77 temperature, and thus rates of photosynthesis ( $A_{\text{net}}$ ) are largely determined by the availability of  
78  $\text{CO}_2$ , which is limited by two resistances in series. First by the diffusion of  $\text{CO}_2$  from the leaf  
79 exterior into the intercellular airspaces through the stomata and second by the diffusion from  
80 intercellular airspaces into the chloroplast, as described by mesophyll conductance ( $g_m$ ). In *A.*  
81 *thaliana*, *AtPIP1;2* was the first aquaporin identified to be a significant contributor to  $g_m$  due to its  
82  $\text{CO}_2$  permeability (Heckwolf et al., 2011), but *AtPIP1;4* has now also been recognised to facilitate  
83  $\text{CO}_2$  diffusion across plasma membranes (Li et al., 2015). Isoforms of the PIP2 subgroup were  
84 believed to be specific to water until they were discovered to also conduct  $\text{H}_2\text{O}_2$  (Dynowski et al.,  
85 2008), which is structurally very closely related to  $\text{H}_2\text{O}$ . However, recently *AtPIP2;1* was also  
86 reported to conduct  $\text{CO}_2$  as well as  $\text{H}_2\text{O}$  and  $\text{H}_2\text{O}_2$  (Wang et al., 2016). Due to the fact that all PIPs  
87 have identical selectivity filters (Wallace and Roberts, 2004), which are major determinants of  
88 substrate permeability, it is reasonable to assume that other isoforms of the PIP1 and PIP2  
89 subgroups may contribute to  $\text{CO}_2$  diffusion across the plasma membrane and affect  $g_m$  in leaves.

90 On the molecular scale, the structures and functions of PIPs have been reasonably well  
91 described in many plants, but this knowledge is largely limited to the cellular level and scaling it up  
92 to the whole plant is more challenging; especially since aquaporin mutants lack an obvious  
93 phenotype under standard conditions. Our main aim was to determine the respective roles of three  
94 *Arabidopsis* PIP isoforms (*AtPIP2;2*, *AtPIP2;4* and *AtPIP2;5*) in the regulation of stomatal ( $g_s$ ) and  
95 mesophyll conductance, both of which can substantially limit rates of photosynthesis. At saturating  
96 light, the  $\text{CO}_2$  concentration drops to about half that of atmosphere ( $c_a$ ) at the sites of carboxylation  
97 ( $c_c$ ). The drawdown from  $c_a$  to  $c_i$  (intercellular  $\text{CO}_2$  concentration) is restricted by  $g_s$ , accounting for  
98 about 60% of the limitation in  $\text{CO}_2$  diffusion, while  $g_m$  accounts for the remaining 40%. Therefore,  
99  $g_m$  is a large, but still poorly understood, limitation of photosynthesis. It has been observed that  
100 water deficit has similar effects on  $g_s$  and  $g_m$  (Warren, 2008, 2008), indicating that they are  
101 interconnected and, at least in part, controlled by the same mechanisms. Furthermore, since most of  
102 the resistance to the diffusion of  $\text{CO}_2$  within the leaf comes from the liquid phase (Warren, 2008), it

103 is conceivable that  $g_m$  could be regulated through the activity of aquaporins. Thus, PIPs may be  
104 instrumental in modulating the link between  $g_s$  and  $g_m$ . Ultimately, modulating PIP function to  
105 increase  $g_m$  without altering  $g_s$ , would enhance  $A_{net}$  without an accompanying increase in  
106 transpiration rates and improve the plant's water use efficiency.

107 Past studies of the functions of aquaporins have generated a wealth of information concerning  
108 single isoforms in *Arabidopsis*, maize and various other herbaceous and woody plant species (Fetter  
109 et al., 2004; Zelazny et al., 2007; Ben Baaziz et al., 2012; Gambetta et al., 2013; Li et al., 2015).  
110 However, the multitude of different species and methods employed also makes it difficult to  
111 develop a cohesive picture of the roles of aquaporins in plants. In this study, we compared three  
112 different single knockout mutants of *A. thaliana* and their wild type (WT) to clarify their putative  
113 roles in whole-plant water flow. Assigning more clearly defined and specific roles to the different  
114 isoforms will aid in determining whether there is redundancy among plant aquaporins. An  
115 indication that different aquaporins are not redundant is given by their differing expression patterns.  
116 In adult plants, *AtPIP2;2* is highly expressed throughout the plant (Javot et al., 2003; Da Ines,  
117 2010), while *AtPIP2;5* reaches moderate to high levels of expression in mature leaves and guard  
118 cells respectively (Alexandersson et al., 2010). However, it shows lower expression levels in roots  
119 (Alexandersson et al., 2005), while *AtPIP2;4* is only moderately expressed in leaves but highly  
120 expressed in roots (Javot et al., 2003). Since the function of PIPs also depends on their mutual  
121 interactions in the tetramer structure (Fetter et al., 2004; Zelazny et al., 2007; Otto et al., 2010), we  
122 furthermore examined two double mutants (*pip2;2x2;4* and *pip2;4x2;5*) as well as a triple mutant  
123 (*pip2;2x2;4x2;5*).

124 We grew plants in two environments differing in the ambient relative humidity. This allowed  
125 us to compare their responses to different vapour pressure deficits (Vpd), which influence  $g_s$  but not  
126  $g_m$  (Warren, 2008), and distinguish the roles of PIPs in the regulation of  $g_m$  and transpiration. A  
127 high Vpd promotes high rates of evaporation and thus triggers plant responses aimed at reducing  
128 transpiration such as stomatal closure. Due to the difficulty of observing an obvious phenotype for  
129 aquaporin knockout mutants growing under ideal conditions, a high Vpd treatment was applied to  
130 increase the relative contribution of aquaporins to plant water flow and the likelihood of finding a  
131 distinct phenotypic response.

132

133

## 134 **Results**

### 135 *Effects of PIP2 aquaporins on gas exchange under high and low humidity*

136 The difference in evaporative demand between the high humidity (HH) and low humidity (LH)  
137 growing conditions had a clear effect on gas exchange and is most strikingly visible in the values of  
138  $g_s$  and its consequences for  $A_{net}$  (Figure 1A-D). In the LH environment, all plant genotypes  
139 displayed 41-61% lower  $g_s$  than in the HH environment (Figure 1C, D). Under LH, however, values  
140 of  $g_s$  in the single and double mutant plants lacking *AtPIP2;4* were reduced less than the WT. Under  
141 LH,  $g_s$  was significantly reduced in the *pip2;4*, *pip2;2x2;4*, and *pip2;2x2;4x2;5* mutants compared  
142 to the WT ( $p = 0.037$ ,  $0.049$  and  $0.008$  respectively), whereas no significant differences between the  
143 same mutants and the WT were observed under HH conditions. The reduction in  $g_s$  under LH  
144 compared to HH was 41%, 53% and 46% for the *pip2;4*, *pip2;2x2;4*, and *pip2;2x2;4x2;5* mutants  
145 respectively. The WT  $g_s$  under LH was reduced by 57% compared to HH.

146  $A-c_i$  curves confirmed that  $A_{net}$  was CO<sub>2</sub>-limited under both HH and LH conditions (Figure 2),  
147 and was strongly influenced by  $g_s$  and  $g_m$ . Consequently, those genotypes in which  $V_{pd}$  had a large  
148 effect on  $g_s$  also displayed large differences in  $A_{net}$  (Figure 1A-D and Table S2). In the WT,  $A_{net}$  was  
149 reduced by 35% in the LH environment compared to the HH environment, whereas the reduction  
150 was only 11% for *pip2;4*.

151 In the HH environment, there was a tendency for the genotypes lacking *AtPIP2;2* to have  
152 higher values of  $g_s$  in the respective knockout mutants compared to the WT (*pip2;2*,  $p = 0.089$ ;  
153 *pip2;2x2;4*,  $p = 0.055$ ; and *pip2;2x2;4x2;5*,  $p = 0.091$ ). Although for the individual mutants alone  
154 this was not a statistically significant effect at  $p < 0.05$ , when all mutant plants lacking *AtPIP2;2*  
155 were considered together as a group, the increase of 28% compared to the WT was statistically  
156 significant ( $p = 0.034$ ).

157 Rates of photosynthesis were very uniform among all genotypes under the HH condition  
158 (Figure 1A, B). Under LH, however,  $A_{net}$  declined less in *pip2;4* and *pip2;4x2;5* than in the WT ( $p =$   
159  $0.010$  and  $0.041$  respectively), as would be expected given their smaller decrease in  $g_s$  from HH to  
160 LH compared with the WT. In addition, the *pip2;5* single mutant had lower values of  $A_{net}$  than the  
161 *pip2;4x2;5* double mutant under both growing conditions (LH  $p = 0.028$ , HH  $p = 0.048$ ).

162 In terms of  $g_m$ , none of the mutant plants differed significantly from the WT under either LH  
163 or HH. Noteworthy however, is the fact that unlike  $A_{net}$  or  $g_s$ ,  $g_m$  increased slightly under LH in all  
164 genotypes except *pip2;5*. Making pairwise comparisons, we found that *pip2;5* had a significantly  
165 lower  $g_m$  than *pip2;4x2;5* and *pip2;2x2;4x2;5* under HH ( $p = 0.065$  and  $0.049$  respectively, Figure  
166 1E, F), whereas under LH differences were smaller and not statistically significant ( $p = 0.217$  and  
167  $0.075$  respectively, Figure 1E, F). There was a similar pattern of effects between the HH and LH

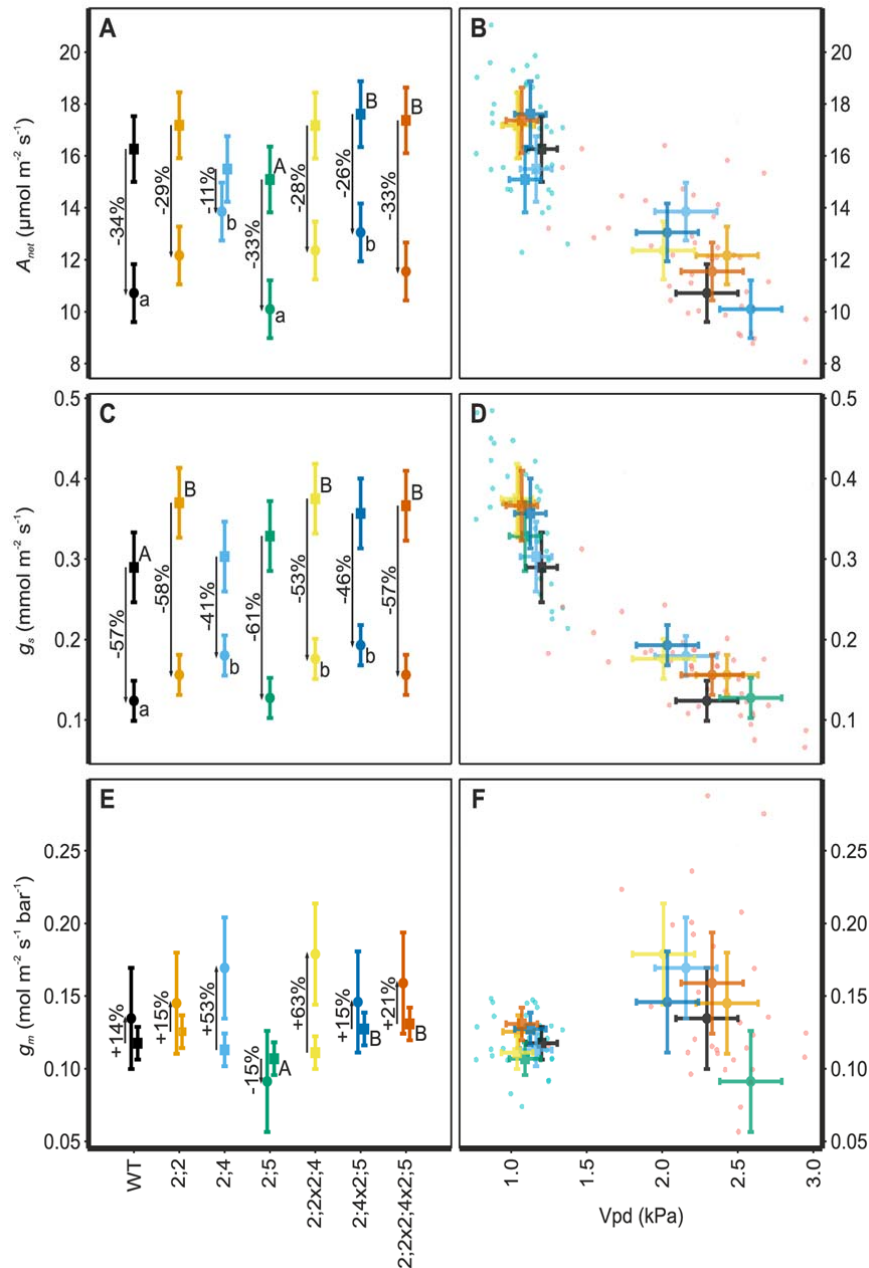

Figure 1: Comparison of gas exchange under low humidity, LH (●), and high humidity, HH (■). The left-hand panels compare mean  $\pm$  pooled SE of  $A_{net}$  (A),  $g_s$  (C) and  $g_m$  (E) among genotypes. Upper and lower case letters indicate statistically significant differences between means within the high and low humidity treatments respectively. The right-hand scatter plots give individual measurements as well as genotype means for gas exchange with respect to Vpd;  $A_{net}$  (B),  $g_s$  (D) and  $g_m$  (F). The HH plants are shown in blue and LH plants in red. There were no significant differences in the relationship to Vpd among the genotypes within the HH and LH set. Gas exchange parameters are summarised in Table S1.

168 environments for  $A_{net}$  among these pairs of mutants: *pip2;5* vs. *pip2;4x2;5* and *pip2;5* vs.



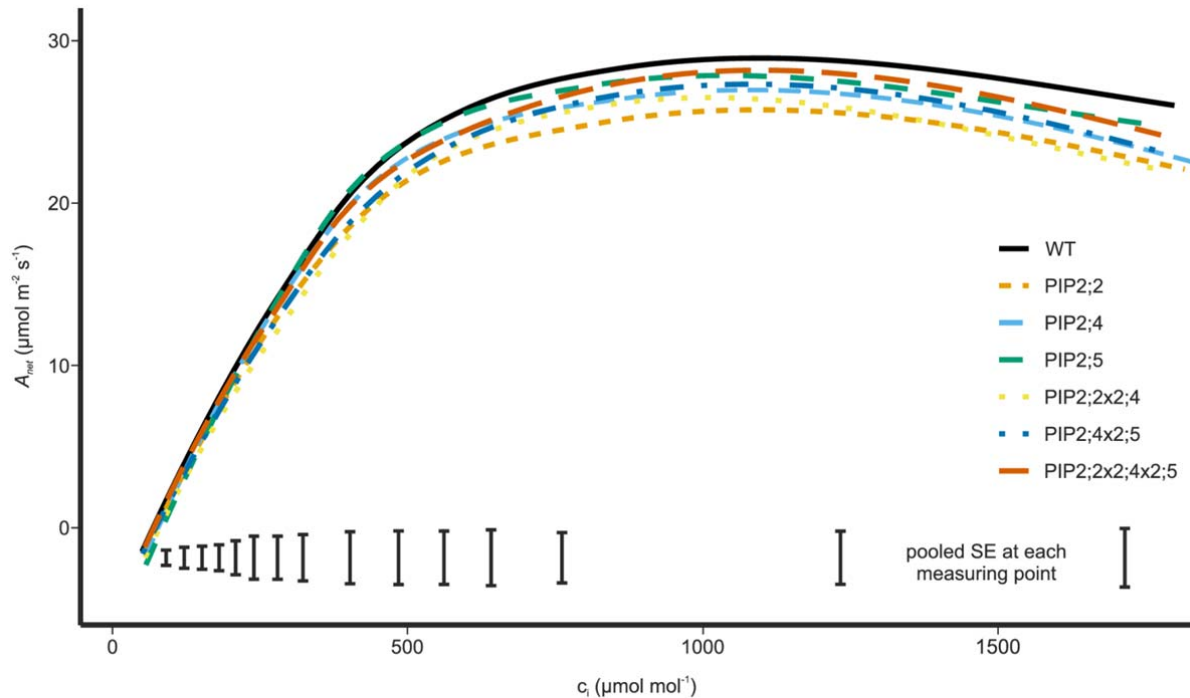

Figure 2: Fitted  $A$ - $c_i$  curves for all mutant lines and the WT measured at PAR = 1500  $\mu\text{mol m}^{-2} \text{s}^{-1}$ . At ambient  $\text{CO}_2$  ( $\approx 400 \mu\text{mol mol}^{-1}$  air),  $A_{\text{net}}$  is  $\text{CO}_2$ -limited, because this  $\text{CO}_2$  concentration is situated in the linear part of the curve. Shown are fitted means with the pooled SE shown at the bottom of the graph.

169 *pip2;2x2;4x2;5* (LH  $p = 0.028$  and  $0.280$  respectively, HH  $p = 0.048$  and  $0.088$  respectively).

170 Both,  $A_{\text{net}}$  and  $g_s$ , responded to Vpd and the individual plant measurements as well as the  
171 means for each genotype form two distinct clusters (Figure 1B, D, F). Values of  $g_m$  were less  
172 responsive to Vpd, but nevertheless form two clearly separate clusters. Variation in terms of Vpd  
173 was larger under LH (2.0 -2.5 kPa) than HH (1.0 – 1.25 kPa), but none of the mutants differed  
174 significantly from the WT in their Vpd under either growing condition, and thus Vpd does not  
175 account for statistically significant differences observed in  $A_{\text{net}}$ ,  $g_s$  or  $g_m$ .

176

177 *Effects of PIP2 aquaporins on mesophyll conductance under high and low humidity measured*  
178 *through A-response curves*

179 We measured  $A$ - $c_i$  curves (Figure 2) to detect effects of the PIP2 mutations on the limits of  $\text{CO}_2$   
180 fixation. There were no significant differences among the genotypes for either the maximum rate of  
181 electron transport ( $J_{\text{max}}$ ) or the maximum rate of carboxylation ( $V_{\text{cmax}}$ ) (Table S2). Furthermore,  
182 there were no differences in  $c_i/c_a$  at low  $\text{CO}_2$  ( $< 400 \mu\text{mol CO}_2 \text{mol}^{-1}$  air), but at high  $\text{CO}_2$  ( $> 400$   
183  $\mu\text{mol CO}_2 \text{mol}^{-1}$  air),  $c_i/c_a$  was significantly lower in all mutants lacking *AtPIP2;5* than in the WT ( $p$   
184 =  $0.008$ ,  $0.013$  and  $<0.001$  for *pip2;5*, *pip2;4x2;5* and *pip2;2x2;4x2;5* respectively; Figure 3A). The

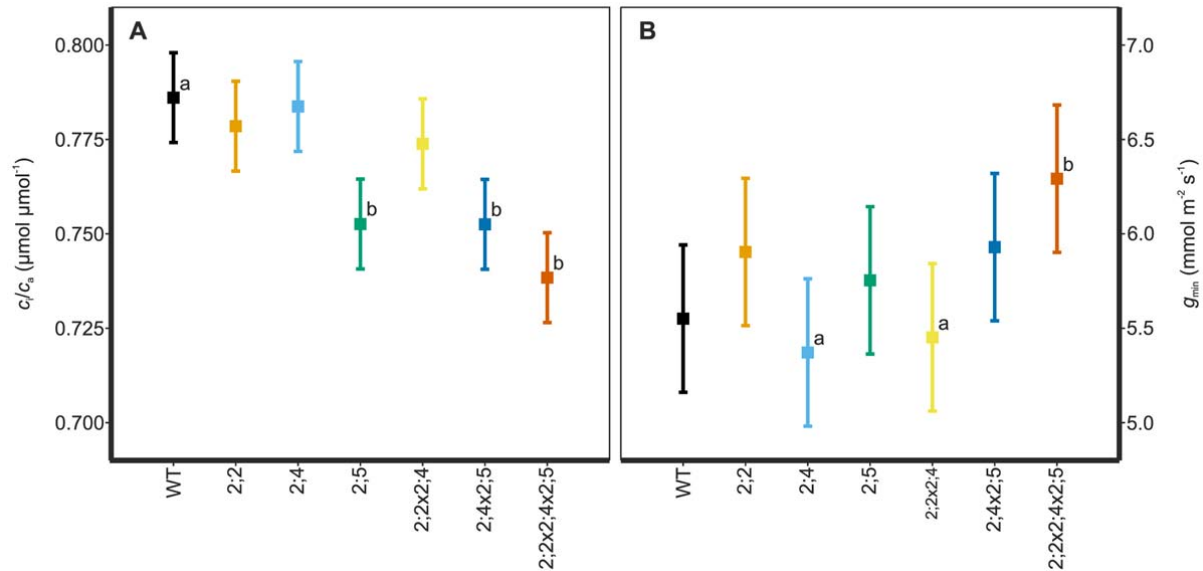

Figure 3: A – The mean  $\pm$  pooled SE  $c_i/c_a$  for measurement points of the  $A-c_i$  curves at higher than ambient  $\text{CO}_2$  concentrations ( $\geq 400 \mu\text{mol mol}^{-1}$  air) and under high humidity. Letters indicate statistically significant differences compared to the WT. B – The mean  $\pm$  pooled SE for minimum conductance,  $g_{\min}$ , under HH. Letters indicate statistically significant differences between mutants.

185  $A-c_i$  curves of the remaining mutants (*pip2;2*, *pip2;4* and their double mutant *pip2;2x2;4*) were  
 186 determined to be significantly different in shape from the WT using a mixed effects generalised  
 187 additive model (GAMM,  $p = 0.002$ ,  $0.039$  and  $0.042$  respectively), but this difference was not large  
 188 enough to affect  $J_{\max}$  or  $V_{\text{cmax}}$ .

189 Figure 4 shows the light response curves for LH-grown plants measured under low oxygen. In  
 190 line with the steady-state measurements of gas exchange, *pip2;5* produced light response curves  
 191 with lower values of  $A_{\text{net}}$ , as well as  $g_s$ , than the other genotypes (13% and 5% lower respectively  
 192 compared to the WT). At points on the curve at saturating PAR ( $500\text{-}2000 \mu\text{mol m}^{-2} \text{s}^{-1}$  for these  
 193 plants),  $A_{\text{net}}$  was not significantly different from the WT for any of the genotypes. However, for  
 194 measurement points at sub-saturating PAR ( $< 500 \mu\text{mol m}^{-2} \text{s}^{-1}$ ),  $A_{\text{net}}$  of *pip2;5* was lower than that  
 195 of all other genotypes including the WT (21 – 50% lower,  $p \leq 0.018$ ). At low light intensities,  $g_s$  did  
 196 not differ among genotypes, whereas at higher light intensities ( $1000\text{-}2000 \mu\text{mol m}^{-2} \text{s}^{-1}$ ), *pip2;5*  
 197 differed significantly from all other genotypes including the WT. Using GAMM, we were able to  
 198 confirm these differences in shape of the light-response curves, which were significant for  $A_{\text{net}}$  as  
 199 well as  $g_s$  in *pip2;5* compared to the WT ( $p = 0.043$  and  $0.001$  respectively). In addition, the curves  
 200 *pip2;2* and *pip2;2x2;4x2;5* also differed significantly from the WT in their response of  $g_s$  to  
 201 increasing PAR ( $p = 0.049$  and  $0.027$  respectively).



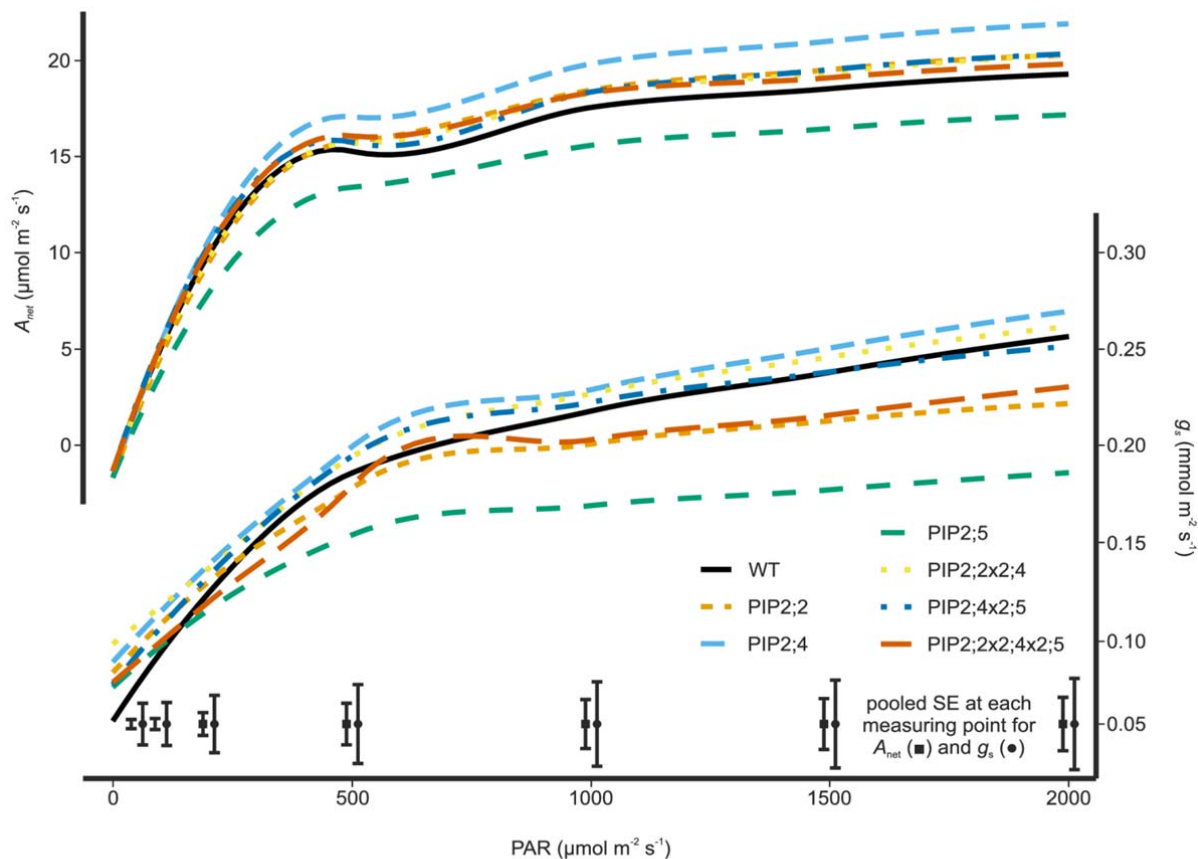

Figure 4: Light response curves measured in under LH showing the rate of photosynthesis (above) and the stomatal conductance (below) in response to increasing radiation. In both cases the *pip2;5* mutant stands out displaying 13% lower  $A_{net}$  as well as a much slower and 5% smaller response of  $g_s$  compared to the wild type. *Pip2;4* showed the opposite trend with 21% higher  $A_{net}$  and 19% higher  $g_s$  compared to the wild type. Given are fitted means with the pooled SE at the bottom of the graph.

202 Values of the minimum conductance of water ( $g_{min}$ ) (Figure 3B) were within the expected  
 203 range of 5-10  $mmol\ m^{-2}\ s^{-1}$  which is small compared to the  $g_s$  of fully open stomata. No significant  
 204 differences in  $g_{min}$  were found between the WT and any of the mutants. Only  $g_{min}$  of *pip2;2x2;4x2;5*  
 205 tended to be higher than the WT ( $p = 0.065$ ), and furthermore both *pip2;4* and *pip2;2x2;4* differed  
 206 significantly from *pip2;2x2;4x2;5* ( $p = 0.029$  and  $0.037$  respectively).

207

#### 208 *CO<sub>2</sub> conductance of AtPIP2;5 expressed in yeast*

209 Yeast cells expressing either *AtPIP2;5*, *AtCA1* or both and loaded with fluorescein diacetate  
 210 displayed significantly different fluorescence intensities after the application of the  $CO_2$  mixing  
 211 buffer (Figure 5). Entry of  $CO_2$  into yeast cells expressing *AtCA1* resulted in  $H_2CO_3^-$  formation (and  
 212 subsequent dissociation into  $H^+$  and  $CO_3^-$ ) and thus intracellular acidification as indicated by a  
 213 decrease in fluorescence intensity. Fluorescence intensity did not decrease in yeast cells expressing

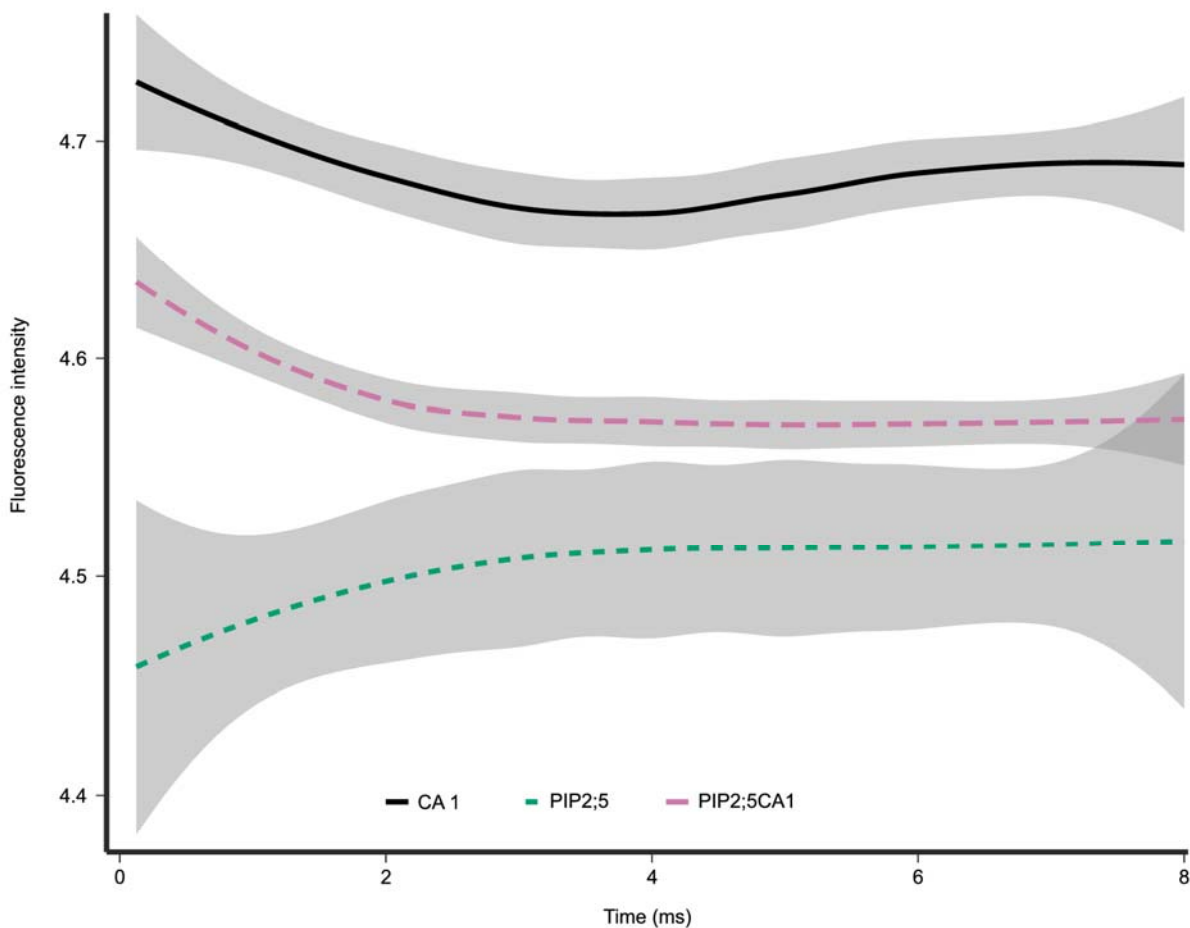

Figure 5: Fluorescence intensity for yeast cells loaded with fluorescein diacetate measured at 0.125 ms intervals. Intracellular acidification in response to the entry of CO<sub>2</sub> causes a decrease in the fluorescence intensity of yeast cells. Given are average curves with 95% confidence intervals.

214 only *AtPIP2;5*, because *AtCA1* was not present and thus no significant acidification occurred  
215 (Figure 6). This assay was used as the first control. Yeast cells expressing only *AtCA1* were used as  
216 a second control in order to quantify the CO<sub>2</sub> permeability of the yeast membrane in the absence of  
217 *AtPIP2;5*. These cells displayed a slight decrease in fluorescence intensity due to *CA1*-facilitated  
218 formation of H<sub>2</sub>CO<sub>3</sub><sup>-</sup> and subsequent intracellular acidification (Figure 6). When *AtPIP2;5* and  
219 *AtCA1* were co-expressed, CO<sub>2</sub> entry into the cells was >100-fold more rapid than in the controls  
220 (Figure 6) indicating that the CO<sub>2</sub>-permeability of the membrane was drastically increased by the  
221 insertion of *AtPIP2;5*.

222

223

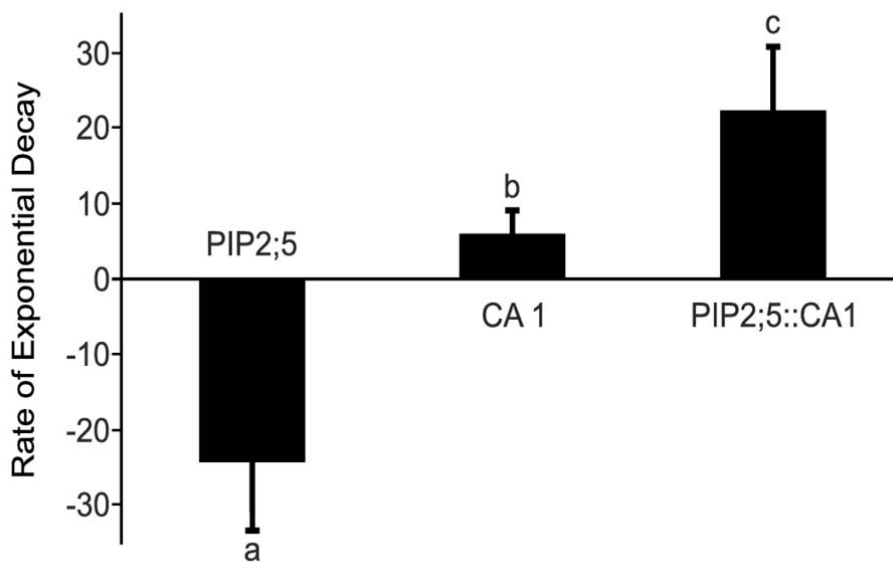

Figure 6: CO<sub>2</sub>-induced intracellular acidification rate of *S. cerevisiae* cells expressing *AtPIP2;5*, *AtCA1* or both. Yeast cells were exposed in a ratio of 1:1 (v/v) to a CO<sub>2</sub>-mixing buffer (25mM HEPES, 75mM NaHCO<sub>3</sub>, pH 6). Kinetics of acidification were measured with an excitation wavelength of 460 nm and emission above 515 nm using a stopped-flow spectrophotometer. Bars represent the CO<sub>2</sub> permeability of yeast expressed as exponential decay rate of fluorescence intensity. The kinetics of the decrease in fluorescence were obtained by fitting an exponential decay function to the curves shown in Figure 5 in order to calculate the rate constants. Values are means  $\pm$  SD of 3 replications. Different letters denote statistically different values at  $p < 0.05$ .

225 In the *Arabidopsis* plants grown with an ample water supply and under HH conditions, similarly to  
226 earlier reports (Javot et al., 2003; Wang et al., 2016), water flow through the various tissues did not  
227 appear to be affected by PIP knockout mutations as evidenced by the very uniform values of  $A_{\text{net}}$   
228 and  $g_s$ . Increasing the evaporative demand by lowering ambient air humidity causes an increase in  
229 the water flow through the plant due to a higher Vpd and hence the contribution of aquaporins to the  
230 regulation of water flow through the plant also increases. By allowing plants to develop and grow  
231 under LH conditions, we aimed to amplify any differences in water relations between the WT and  
232 knockout mutants (Figure 1).

233 *AtPIP2;5* has been reported to respond to various stresses such as  $\text{H}_2\text{O}_2$  (Hooijmaijers et al.,  
234 2012) and salt (Lee and Zwiazek, 2015), as well as being up-regulated by drought (Alexandersson  
235 et al., 2010), but it is only expressed at intermediate levels under standard growing conditions,  
236 especially in the roots (Jang et al., 2004; Lee et al., 2012). This is consistent with the absence of an  
237 effect on  $A_{\text{net}}$  and  $g_s$  in *pip2;5* compared with the WT in our HH environment. However under LH,  
238  $g_m$  was reduced at steady state (Figure 1E) as was  $A_{\text{net}}$  and  $g_s$  in the light-response curves (Figure 4)  
239 in this mutant compared to the WT. Reduced  $g_m$  is a commonly reported response to drought  
240 (Warren et al., 2004; Warren, 2008, 2008), but since our plants were not experiencing soil water  
241 stress,  $g_m$  remained unchanged or slightly increased under LH compared with HH. We suggest that  
242 high soil water content in our experiment allowed plants to avoid water-stress under LH partially  
243 explaining the lack of a concomitant effect on  $A_{\text{net}}$  or  $g_s$  in *pip2;5* with reduced  $g_m$ . The differences  
244 in  $g_m$  that we found suggests that *AtPIP2;5* is involved in the regulation of  $g_m$  *in planta*. Our  
245 stopped-flow measurements on yeast cells expressing *AtPIP2;5* provided supporting evidence for  
246 this, since they clearly show that *AtPIP2;5* is permeable to  $\text{CO}_2$ , when expressed in yeast, and thus  
247 its ability to regulate  $g_m$  is likely due to it directly facilitating  $\text{CO}_2$  diffusion across the cell  
248 membrane. *AtPIP2;5* has not previously been shown to alter  $\text{CO}_2$  fluxes across cell membranes to  
249 affect  $g_m$  nor has it, to our knowledge, been tested for  $\text{CO}_2$  permeability.

250 The fact that *AtPIP2;5* is upregulated during drought, differentiates it from most other PIPs  
251 and the lack of functional *AtPIP2;5* in combination with LH may thus have triggered the drop in  $g_m$ .  
252 It is furthermore only weakly co-expressed with one other PIP isoform, *AtPIP1;4* (Alexandersson et  
253 al., 2010), which reduces the likelihood of other aquaporins compensating for its lack in the  
254 knockout mutants, but in the very same mutants, the proper insertion of *AtPIP1;4* into the plasma  
255 membrane may be reduced due to the missing interaction with *AtPIP2;5*. *AtPIP2;5* may thus also be  
256 involved in maintaining  $g_m$  across a greater range of watering and humidity regimes by affecting the  
257 function of *AtPIP1;4* (Fetter et al., 2004; Zelazny et al., 2007; Otto et al., 2010), which is not only  
258 upregulated by drought (Alexandersson et al., 2010), but has been shown to also contribute to  $\text{CO}_2$

259 membrane permeability (Li et al., 2015). Further evidence to support this theory is provided by the  
260 results of our light-response curves where  $g_s$  was similar for all genotypes, whereas the  $A_{net}$ , of  
261 *pip2;5* was clearly lower than in the other genotypes. Therefore, contrary to our expectations,  $g_s$  did  
262 not behave like  $A_{net}$  in *pip2;5* in response to a changing light environment, particularly at sub-  
263 saturating PAR. It would therefore appear that *AtPIP2;5*, despite its relatively low abundance (Lee  
264 et al., 2012), does reduce the resistance to CO<sub>2</sub> diffusion through the mesophyll under light- and  
265 CO<sub>2</sub>-limiting conditions.

266 Further evidence in support of *AtPIP2;5* regulating  $g_m$  is provided by our  $A$ - $c_i$  curves. Its  
267 knockout mutation did not appear to significantly affect  $J_{max}$  or  $V_{cmax}$ , which was not unexpected  
268 since none of the PIPs have previously been shown to impact chlorophyll fluorescence or CO<sub>2</sub>  
269 fixation by Rubisco. However, the  $c_i/c_a$  was significantly lower than the WT at high [CO<sub>2</sub>] for all  
270 mutants lacking *AtPIP2;5* (Figure 3A). Since  $c_a$  was constant, the lower  $c_i/c_a$  was due to lower  $c_i$ ,  
271 likely the result of an incremental effect on a combination of  $A_{net}$  and  $g_s$  during the  $A$ - $c_i$  curve or an  
272 increase in  $g_m$ .

273 The interaction of PIPs was previously demonstrated to modify their function and export from  
274 the ER (Fetter et al., 2004; Zelazny et al., 2007; Otto et al., 2010). PIP2s interact with PIP1s  
275 forming tetrameric assemblies in the ER to ensure proper export and insertion into the plasma  
276 membrane. PIP1s are retained in the ER if no interaction with other PIP isoforms occurs (Zelazny et  
277 al., 2007) and it is thus conceivable that *AtPIP2;5*, even though normally weakly expressed, impacts  
278 membrane permeability to CO<sub>2</sub> by providing targeting signals for the proper integration of CO<sub>2</sub>-  
279 conducting PIP1s, *AtPIP1;4* in particular, into the plasma membrane. The fact that *pip2;5* displayed  
280 significantly lower values of  $A_{net}$  and  $g_s$  than the respective double and triple mutant furthermore  
281 suggests that its role as a targeting signal for proper membrane integration of PIP1s can be fulfilled  
282 by other PIP2s that are activated/upregulated in multiple knockout mutants. Serving as targeting  
283 signals is thus most likely a function common to all PIP2 isoforms. In general, multiple knockout  
284 mutations of PIP2s did not cause larger effects than single knockout mutation, indicating that the  
285 remaining intact isoforms are capable of compensating under adequate watering conditions.

286 The  $g_s$  of *pip2;2*, *pip2;4* as well as that of the double and triple mutants increased relative to  
287 the WT. Significant differences occurred for *pip2;2*, *pip2;2x2;4* and *pip2;2x2;4x2;5* under HH,  
288 whereas for *pip2;4*, *pip2;2x2;4* and *pip2;4x2;5* higher  $g_s$  was observed under LH. *AtPIP2;2* has  
289 been more intensely studied than *AtPIP2;4* or *AtPIP2;5*, and has been found to be among the most  
290 abundantly expressed PIPs in the plant (Javot et al., 2003; Da Ines, 2010). Its knockout mutation  
291 has furthermore been reported to induce no compensatory aquaporin gene expression nor a visible  
292 phenotype (Javot et al., 2003). However, *AtPIP2;2* contributes to cell hydraulic conductivity in the



293 root cortex (Javot et al., 2003) and thus, without the up-regulation of other PIPs or a visible  
294 phenotype, it is likely that any compensatory response occurs at the level of stomatal regulation  
295 leading to the higher  $g_s$  that we report. This in turn would enhance the water flow through plant  
296 tissues via other PIP isoforms or the apoplast as may also be the case in the *pip2;4* mutant.

297 Interestingly, under LH  $g_s$  of mutants lacking *AtPIP2;2* did not significantly differ from the  
298 WT. *AtPIP2;2* has previously been shown to be drought-sensitive (Alexandersson et al., 2010), but  
299 as our plants were not drought stressed, it is probable that the absence of *AtPIP2;2* may be  
300 compensated by increased water flow through the apoplastic pathway or other PIPs. *AtPIP2;4*  
301 appears to be a better candidate for manipulating plant water relations, since *pip2;4* displayed  
302 higher  $g_s$  compared with the WT in the LH environment, but not under HH.

303 None of the plants that we investigated showed differences in  $g_{min}$  (Figure 3B) or RWC  
304 (Table S2), which indicates that the observed effects on  $g_s$  and  $g_m$  are unlikely to be due to an effect  
305 of the knockout mutation on leaf water status. We also did not find any visible phenotype under  
306 either HH or LH. Therefore, the differences we report between the mutants and the WT are more  
307 likely to be a direct result of the knockout mutation and lack of aquaporin function rather than an  
308 indirect effect caused by altered leaf water status.

309

## 310 **Conclusion**

311 We report that *AtPIP2;5* is permeable to CO<sub>2</sub> when expressed in yeast and that it is a  
312 physiologically relevant regulator of mesophyll conductance of CO<sub>2</sub> in leaves of *A. thaliana* under  
313 conditions of high evaporative demand.

314 Likewise, *AtPIP2;4* plays a role in maintaining a positive leaf water balance and maintaining  
315 high IWUE. It may also be a suitable target for crop improvement, since the lack of *AtPIP2;4*  
316 caused a 29% increase in  $A_{net}$  when  $V_{pd}$  was high, though at the expense of IWUE. Identification of  
317 the mechanisms underpinning this result may represent the means of teasing apart the factors  
318 regulating  $g_s$  and  $g_m$ .

319

## 320 **Materials and Methods**

### 321 *Plant Material*

322 T-DNA single knock-out mutants of *Arabidopsis thaliana* were obtained from the Nottingham  
323 Arabidopsis Stock Centre (NASC – [www.arabidopsis.org](http://www.arabidopsis.org)) for the following aquaporins: *PIP2;2*  
324 (N871747), *PIP2;4* (N105980) and *PIP2;5* (N117303) in the Columbia background (Alonso et al.,  
325 2003). All genotypes were checked by PCR to confirm correct T-DNA insertion and homozygosity.  
326 Only homozygous plants were used to grow a seed stock and in the subsequent experiments.



327 Multiple knock-out plants were created by crossing, which resulted in a total of two different double  
328 mutant lines – *pip2;2x2;4*, *pip2;4x2;5* – and one triple mutant – *pip2;2x2;4x2;5*.

329 Since  $g_m$  exhibits acclimation to environmental conditions (Warren, 2008), we grew the plants  
330 under different humidities in two locations instead of raising them in the same environment and  
331 subjecting them to short-term treatments, which would likely affect both  $g_m$  and  $g_s$  and thus prevent  
332 us from separating the role of aquaporins in these two processes. The environmental parameters for  
333 the high humidity and low humidity locations are summarised in Table S1.

334

### 335 *Low humidity growing conditions*

336 The experiment was carried out in a greenhouse at the University of Sydney, Sydney, Australia.  
337 Seeds of the *A. thaliana* genotypes were sown in pots containing a potting mix (Scotts Osmocote –  
338 plus trace elements) and germinated in the light under the conditions described in Table S1.  
339 Seedlings were transplanted four days after germination into square plastic pots 20 cm high and 6  
340 cm wide. Pots were over-filled with the same pre-fertilised potting mix, as described in Flexas et al.  
341 2007 (Flexas et al., 2007). Young seedlings were kept under a transparent plastic cover for a few  
342 days after transplanting to help keep them moist. The pots were arranged randomly and rearranged  
343 every second day to ensure even light interception and minimise any effects of air movement  
344 caused by the air conditioning. All measurements were carried out between 9:30 am and 16:30 pm  
345 on 25-39-day old plants using only fully expanded leaves at least 4 cm long, a period when  $A_{net}$  is  
346 reported to be stable (Flexas et al., 2007). The experiment was conducted during the Australian  
347 spring from mid-October and mid-December 2015. During this time, new seeds were planted at  
348 weekly intervals in order to continuously provide plants of equivalent ages for measuring.

349 Plants were provided with ample water in order to prevent soil water stress signalling from  
350 the roots, because our aim was to expose plants to low air humidity without imposing other  
351 accompanying stresses. Water was provided from below as soon as the soil surface had dried (every  
352 2-3 days), but after the day's measurements.

353

### 354 *High humidity growing conditions*

355 Seeds of the *A. thaliana* genotypes were sown and grown in a pre-fertilised peat-vermiculite  
356 mixture (1:1) in square 8 cm wide and 6 cm high plastic pots. Seedlings were transplanted four days  
357 after germination into over-filled pots as described above. Plants were grown in a growth chamber  
358 under conditions described in Table S1 and the light spectrum shown in Figure S1. Measurements  
359 were carried out between 9:00 am and 16:00 pm from October 2016 until January 2017 on 27-33-  
360 day old plants using only fully expanded leaves at least 4 cm long. The plants were watered as in

361 the low humidity treatment described above, but due to the higher air humidity in these growing  
362 conditions, watering was required only once a week.

363

### 364 *Gas Exchange Measurements*

365 All gas exchange measurements were carried out with the portable photosynthesis system  
366 LI6400XT infra-red gas analyser (IGRA) equipped with a fluorescence chamber (LI-COR  
367 Biosciences, Nebraska, USA) during the same 7-h time-window every day in order to minimise  
368 diurnal effects. The leaf chamber (leaf chamber fluorometer – LCF), a 2 cm<sup>2</sup> circular cuvette,  
369 allowed single leaves to be measured. A few leaves that did not fill the chamber entirely, were  
370 placed in the middle of the circular window leaving equal gaps on either side. The area of these  
371 gaps was calculated using the following formula:

$$A = 2 \left[ r^2 \cos^{-1} \left( \frac{r-h}{r} \right) - (r-h) \sqrt{2rh - h^2} \right] \quad (1)$$

372 , where  $r$  is the chamber radius (7.979 mm) and  $h$  is the height of the circle segment not covered by  
373 the leaf or in other words, the distance from the edge of the leaf to the rim of the chamber.  $h$  was  
374 obtained by:

$$h = \frac{2r - w}{2} \quad (2)$$

375 , where  $w$  is the width of the flat leaf as measured with a sliding calliper. The area of the chamber  
376 covered by the leaf was then calculated simply subtracting the area of the two gaps as calculated  
377 above from the total area of the leaf chamber (2 cm<sup>2</sup>).

378 In the low humidity greenhouse experiment, photosynthetic light responses were measured  
379 under non-photorespiratory conditions (1% O<sub>2</sub>, 400 μmol mol<sup>-1</sup> CO<sub>2</sub>) to determine the relationship  
380 between photosynthetic rate and light intensity as well as the relationship between chlorophyll  
381 fluorescence ( $J_f$ ) and the rate of electron transport ( $J_a$ ). High purity N<sub>2</sub> gas (BOC Gas, Australia)  
382 was mixed with air to create a 1% O<sub>2</sub> mixture, directly attached to the air inlet of the LICOR-6400.  
383 Under non-photorespiratory conditions,  $J_a$  is entirely dependent on gross photosynthesis  $A$ :

$$J_a = 4(A + R_d) \quad (3)$$

384 Before each measurement, the plant leaf was dark adapted for 30 min by wrapping it in aluminium  
385 foil. The curves were subsequently measured using an automated program with following fixed  
386 settings: T: 25°C, leaf fan: fast, CO<sub>2</sub>R: 400 μmol mol<sup>-1</sup>, flow: 300 μmol s<sup>-1</sup> and 10% blue light. At  
387 the beginning of the program the leaf was given a further 5 min of dark adaptation within the  
388 chamber. This step allowed the measuring chamber-leaf system sufficient time to reach a steady  
389 state. Light adaptation lasted for 30 min at maximum irradiance (PAR 2000 μmol m<sup>-2</sup> s<sup>-1</sup>). The light

390 curves began at the highest irradiance and decreased at ca. 4 min intervals of acclimation time  
391 between each step: 2000, 1500, 1000, 500, 200, 100, 50, 20 and 0  $\mu\text{mol m}^{-2} \text{s}^{-1}$ .

392 In the high humidity growth chamber experiment, full  $A-c_i$  curves were measured with an  
393 automated program throughout the curve with the following fixed parameters: flow: 300  $\mu\text{mol s}^{-1}$ ,  
394 T: 25°C, PAR: 1500  $\mu\text{mol m}^{-2} \text{s}^{-1}$ , 10% blue, leaf fan: fast,  $\text{CO}_2\text{R}$ : 400  $\mu\text{mol mol}^{-1}$ . Plants were  
395 allowed an acclimation time of 10 min in the leaf chamber before the first measurement at 400  
396  $\mu\text{mol mol}^{-1} \text{CO}_2$ . After the first measurement, the following steps with 3 min acclimation time  
397 between each step were used to obtain a complete  $A-c_i$  curve: 450, 550, 650, 750, 850, 1000, 1500,  
398 2000, 400, 350, 300, 250, 200, 150, 100, 50  $\mu\text{mol mol}^{-1}$  (Warren and Dreyer, 2006).

399 The Laisk method (Laisk, 1977; Brooks and Farquhar, 1985) was used to estimate  $c_i^*$   
400 (photorespiratory compensation point) and  $R_d$  (respiration in the light), which are variables required  
401 for the calculation of  $g_m$ . In both experiments (LH and HH conditions), an automated program with  
402 the same general settings was used for the Laisk method: T: 25°C, leaf fan: fast,  $\text{CO}_2\text{R}$ : 400  $\mu\text{mol}$   
403  $\text{mol}^{-1}$ , flow: 200  $\mu\text{mol s}^{-1}$ , PAR 1500  $\mu\text{mol m}^{-2} \text{s}^{-1}$ , 10 % blue. Before the measurements for the  
404 Laisk method, plants were allowed to acclimate and then measured at steady state. The  $A-c_i$  curves  
405 were measured at PAR 300, 150, 100, 50  $\mu\text{mol m}^{-2} \text{s}^{-1}$  and after each curve,  $\text{CO}_2$  was returned to  
406 400  $\mu\text{mol mol}^{-1}$  for 5 min to maintain RuBisCo activation. The  $\text{CO}_2$  steps used for the curve are  
407 150, 125, 100, 75, 50  $\mu\text{mol mol}^{-1}$  with ca. 3 min acclimation time between each step.

408 Water loss through leaves is not only governed by stomata, but also occurs through the  
409 epidermis and cuticle.  $g_{\text{min}}$  describes the minimum conductance that is the rate of water loss from  
410 leaves due to direct diffusion through the cuticle and leaky stomata. This pathway for gas exchange  
411 is often neglected as it represents only values in the range of 5-10  $\text{mmol m}^{-2} \text{s}^{-1} \text{H}_2\text{O}$  (Figure 3B,  
412 Table S2, (Duursma et al., 2019)) as compared to a  $g_s$  of 100 - 400  $\text{mmol m}^{-2} \text{s}^{-1}$  for actively  
413 transpiring *Arabidopsis* leaves (Figure 1C). Nevertheless, neglecting  $g_{\text{min}}$  introduces an error in  
414 estimations of  $g_s$ . Aquaporins may have the potential to alter  $g_{\text{min}}$  either through the regulation of  
415 leaf development or by increasing/decreasing the water permeability of the epidermis itself.  
416 Therefore, all gas exchange data were adjusted to account for  $g_{\text{min}}$  as well as any  $\text{CO}_2$  leaks into or  
417 out of the LICOR measuring chamber. We estimated  $g_{\text{min}}$  for fully expanded leaves using the  
418 protocol described by Sack (Sack, 2010) with some modifications to accommodate fragile and small  
419 *Arabidopsis* leaves: for each data point, three leaves that were suitably large for gas exchange  
420 measurements were excised from 21 plants/line close to the centre of the rosette. The leaves were  
421 weighed for initial fresh weight (*FW*), placed on millimetre graph paper and photographed to  
422 calculate their initial leaf area using ImageJ as described by Wang (2016) (Wang, 2016). After  
423 photographing, they were placed on labelled Petri dishes and allowed to dry at room temperature

424 (20°C) for 1 h until complete stomatal closure. From this point on, leaves were weighed every 25-  
425 30 min and at each weighing step, temperature, ambient air humidity and time was recorded. The  
426 first time point after the 1 h drying period was taken to be time 0. After six to ten time points had  
427 been obtained over the course of 3-4 h, the leaves were again photographed to calculate their final  
428 leaf area. The collected data were input into the “ $g_{\min}$  Analysis Spreadsheet Tool” (Sack, 2010)  
429 together with the saturation vapour pressure (Table A7, p. 430-431, Pearcy et al. 1989 (Pearcy  
430 R.W., 1989)) in order to calculate  $g_{\min}$ .

431 The leak flow was calculated using the manufacturer’s instruction, however, we placed an  
432 intact leaf in the chamber instead of carrying out the estimation for an empty chamber. In the dark,  
433 the leaf’s respiration rates should not be affected by changing CO<sub>2</sub> concentrations or flow rates and  
434 thus can be considered constant. Therefore, we were able to obtain a diffusion coefficient of 0.40  
435 mol s<sup>-1</sup> for the actual measuring conditions, which is similar to the 0.44 mol s<sup>-1</sup> obtained by Flexas  
436 et al. (2007) (Flexas et al., 2007).

437 The mesophyll conductance of CO<sub>2</sub>, was estimated using the variable J method as described  
438 by Harley et al. 1992 (Harley et al., 1992):

$$g_m = \frac{A}{c_i - \frac{c_i^* [J + 8(A + R_d)]}{J - 4(A + R_d)}} \quad (4)$$

439 The variables  $A$ ,  $c_i$  and  $J$  were obtained from the combined gas exchange and chlorophyll  
440 fluorescence measurements.  $R_d$  as well as  $c_i^*$  were estimated from the Laisk method by plotting the  
441  $A$ - $c_i$  curves in excel and calculating their common intersection point using slope-intercept  
442 regression (Walker and Ort, 2015). As we did not find any statistically significant differences in  
443 either  $R_d$  or  $c_i^*$  between the different genotypes, we calculated a global average for both variables  
444 for each growing condition in order to obtain a more robust estimate of  $g_m$ .

445 Parameters  $J_{\max}$ ,  $V_{c\max}$  and the inflection point were estimated from  $A$ - $c_i$  curves. These  
446 parameters were obtained using the online Excel tool provided by Carl Bernacchi’s lab (Bernacchi),  
447 which is based on the Michaelis-Menten constants of CO<sub>2</sub> ( $K_c$ ) and O<sub>2</sub> ( $K_o$ ) at  $c_i$  as described by  
448 Bernacchi et al. (2001) (Bernacchi et al., 2001).

449

#### 450 *Leaf water relations*

451 The same harvested leaves that had been used for estimating cuticular conductance were floated on  
452 water overnight to obtain their saturated weights ( $SW$ ). Finally, the leaves were dried in a drying  
453 oven overnight at 60°C to obtain their dry weights ( $DW$ ). The relative water content ( $RWC$ ) was  
454 then calculated using the following formula:

$$RWC = 100 \frac{FW - DW}{SW - DW} \quad (5)$$

455

#### 456 *RNA Extraction and cloning*

457 Tissue from 6 days old seedlings of *A. thaliana* ecotype Columbia (Col-0) were used for RNA  
458 extraction. Total RNA was extracted using the QIAGEN RNeasy Plant Mini Kit (Qiagen, Valencia,  
459 CA, USA). RNA concentration and purity were assessed using the Thermo Scientific™  
460 NanoDrop™ One Microvolume UV-Vis Spectrophotometer (Thermo Scientific, Waltham, MA,  
461 USA). The first-strand cDNAs were synthesized from 1 µg of total RNA using Superscript II  
462 reverse transcriptase (Invitrogen) and an oligo (dT) primer. Coding sequences of *Arabidopsis*  
463 PIP2;5 (AT3G54820) and carbonic anhydrase 1 (CA1; AT3G01500) were amplified with Phusion  
464 DNA Polymerase using the primers listed in Table S3. The PCR products of the expected size were  
465 eluted from the gel and purified using the Wizard® SV Gel and PCR Clean-Up System (Promega,  
466 Madison, WI, USA). The PCR products were then cloned into a pCR2.1-TOPO vector using the  
467 Topo TA Cloning kit (Invitrogen, Carlsbad, CA, USA) and transformed into DH5α chemically  
468 competent cells (Invitrogen, Carlsbad, CA, USA). About three to six white colonies were sequenced  
469 for each PCR product using M13 sequencing primers.

470

#### 471 *Plasmid construction and yeast transformation*

472 Open reading frame (ORF) of *AtPIP2;5* and Carbonic anhydrase 1 (*AtCA1*) were cloned as Gateway  
473 entry clones in plasmid pDONR221 (Invitrogen). ORFs of *AtPIP2;5* and *CA1* from the entry clones  
474 were shuttled into the galactose-inducible yeast expression plasmid pAG426GAL-ccdB (Addgene:  
475 Plasmid #1415) and pAG425GAL-ccdB (Addgene: Plasmid #14153), respectively by Gateway LR  
476 cloning reaction. The S.c. EasyComp™ Transformation Kit (ThermoFisher Scientific) was used to  
477 transform *S. cerevisiae* yeast strain (INVSc1 from ThermoFisher Scientific) with each plasmid  
478 DNA. Double transformants were used for CO<sub>2</sub> permeability measurements containing *AtCA1* and  
479 *AtPIP2;5* (*AtCA1::AtPIP2;5*) constructs were selected by *ura3* and *leu2* complementation.  
480 Expression of the constructs was verified by qRT-PCR using SYBR Green I dye in an Applied  
481 Biosystems 7500 Fast system.

482

#### 483 *Loading of yeast cells with fluorescein diacetate*

484 Loading of the yeast cells with fluorescein diacetate was carried out according to the protocol  
485 described by Bertl and Kaldenhoff (2007) (Bertl and Kaldenhoff, 2007). In brief, cells were  
486 harvested by centrifugation and then resuspended in loading buffer (50 mM HEPES-NaOH pH 7.0;

487 5 mM 2-deoxy-D-glucose) with 50  $\mu$ M of fluorescein diacetate, incubated for 14 min at 30 °C with  
488 shaking at  $\sim$  225 rpm and centrifuged again at 1,700 g for 3 min at 4 ° C. The cells were then  
489 resuspended in incubation buffer (25 mM HEPES; 75 mM NaCl) and kept on ice until use.

490

#### 491 *CO<sub>2</sub> conductance measurements*

492 The entry of CO<sub>2</sub> through the plasma membrane was followed by intracellular acidification and  
493 decreased fluorescence in whole yeast cells loaded with fluorescein diacetate. The cells were  
494 resuspended in incubation buffer to a final OD600 of 60 just before use. 50  $\mu$ L of dissolved cells in  
495 the incubation buffer were mixed rapidly in a 1: 1 (v / v) ratio with CO<sub>2</sub>-Mixing Buffer (25mM  
496 HEPES, 75mM NaHCO<sub>3</sub>, pH 6) at a rate of 100  $\mu$ L / s in a stopped flow spectrophotometer  
497 (Applied Photophysics, DX.17 MV). The CO<sub>2</sub> input was followed by the decrease in fluorescence  
498 intensity (90°). The spectrophotometer emitted at a  $\lambda$  of 490 nm (maximum excitation wavelength  
499 of the fluorescein). The receiver had a filter attached that did not allow the passage of wavelengths  
500 below 515 nm, because fluorescein emits at  $\lambda$  of no longer than 514 nm. The fluorescence was  
501 recorded over time and the conductivity quantification (K-relative) was calculated by fitting the  
502 experimental data to a function of decreasing exponential during the first 8.0 ms using SigmaPlot  
503 11.0 (Systat Software Inc., Chicago, IL, USA).

504

#### 505 *Data processing and statistical analysis*

506 ANOVAs were conducted separately for the LH and HH experiment in R (package Deducer) using  
507 a linear model with plant genotype and the measured variable as the factors, and for each  
508 graph/panel we calculated the pooled standard error:

$$SE_{pooled} = \sqrt{\frac{(SE_i^2 + SE_{i+1}^2 + \dots + SE_n^2)}{n}} \quad (6)$$

509 , where  $SE_i$  is the standard error of the mean and  $n$  is the total number of means.  $n = 21$  for  
510 estimations of  $g_{min}$  and RWC, while for all gas exchange measurements  $n = 4 - 9$ . Tukey's multiple  
511 comparison was used to compare the means of all measured variables for the mutant lines to the  
512 WT as well as with each other.

513 GAMM (package = 'mgcv') (Wood, 2017b) was used to evaluate the photosynthetic response  
514 curves with the mutant line as a parametric term and a smoothing term for PAR and  $c_i$ . Due to  
515 heterogeneous variation we employed the weighting function 'weights=varExp'. The fluorescence  
516 decay rates from the stopped flow measurements were compared with GLM using the Duncan's  
517 Multiple Range Test.



518

## 519 Acknowledgments

520 We thank Mikael Brosché for providing the seeds of the knockout mutants.

521 This work was funded by the Finnish Cultural Foundation.

522

## 523 Figure legends

524 Figure 1: Comparison of gas exchange under low humidity, LH (●), and high humidity, HH (■).

525 The left-hand panels compare mean  $\pm$  pooled SE of  $A_{\text{net}}$  (A),  $g_s$  (C) and  $g_m$  (E) among genotypes.

526 Upper and lower case letters indicate statistically significant differences between means within the

527 high and low humidity treatments respectively. The right-hand scatter plots give individual

528 measurements as well as genotype means for gas exchange with respect to  $V_{\text{pd}}$ ;  $A_{\text{net}}$  (B),  $g_s$  (D) and

529  $g_m$  (F). The HH plants are shown in blue and LH plants in red. There were no significant differences

530 in the relationship to  $V_{\text{pd}}$  among the genotypes within the HH and LH set. Gas exchange

531 parameters are summarised in Table S1.

532

533 Figure 2: Fitted  $A$ - $c_i$  curves for all mutant lines and the WT measured at  $\text{PAR} = 1500 \mu\text{mol m}^{-2} \text{s}^{-1}$ .

534 At ambient  $\text{CO}_2$  ( $\approx 400 \mu\text{mol mol}^{-1}$  air),  $A_{\text{net}}$  is  $\text{CO}_2$ -limited, because this  $\text{CO}_2$  concentration is

535 situated in the linear part of the curve. Shown are fitted means with the pooled SE shown at the

536 bottom of the graph.

537

538 Figure 3: A – The mean  $\pm$  pooled SE  $c_i/c_a$  for measurement points of the  $A$ - $c_i$  curves at higher than

539 ambient  $\text{CO}_2$  concentrations ( $\geq 400 \mu\text{mol mol}^{-1}$  air) and under high humidity. Letters indicate

540 statistically significant differences compared to the WT. B – The mean  $\pm$  pooled SE for minimum

541 conductance,  $g_{\text{min}}$ , under HH. Letters indicate statistically significant differences between mutants.

542

543 Figure 4: Light response curves measured in under LH showing the rate of photosynthesis (above)

544 and the stomatal conductance (below) in response to increasing radiation. In both cases the *pip2;5*

545 mutant stands out displaying 13% lower  $A_{\text{net}}$  as well as a much slower and 5% smaller response of

546  $g_s$  compared to the wild type. *Pip2;4* showed the opposite trend with 21% higher  $A_{\text{net}}$  and 19%

547 higher  $g_s$  compared to the wild type. Given are fitted means with the pooled SE at the bottom of the

548 graph.

549

550 Figure 5: Fluorescence intensity for yeast cells loaded with fluorescein diacetate measured at 0.125  
551 ms intervals. Intracellular acidification in response to the entry of CO<sub>2</sub> causes a decrease in the  
552 fluorescence intensity of yeast cells. Given are average curves with 95% confidence intervals.

553

554 Figure 6: CO<sub>2</sub>-induced intracellular acidification rate of *S. cerevisiae* cells expressing *AtPIP2;5*,  
555 *AtCA1* or both. Yeast cells were exposed in a ratio of 1: 1 (v/v) to a CO<sub>2</sub>-mixing buffer (25mM  
556 HEPES, 75mM NaHCO<sub>3</sub>, pH 6). Kinetics of acidification were measured with an excitation  
557 wavelength of 460 nm and emission above 515 nm using a stopped-flow spectrophotometer. Bars  
558 represent the CO<sub>2</sub> permeability of yeast expressed as exponential decay rate of fluorescence  
559 intensity. The kinetics of the decrease in fluorescence were obtained by fitting an exponential decay  
560 function to the curves shown in Figure 5 in order to calculate the rate constants. Values are means ±  
561 SD of 3 replications. Different letters denote statistically different values at  $p < 0.05$ .

562

563

## Parsed Citations

**Agre P, Sasaki S, Chrispeels MJ (1993) Aquaporins: a family of water channel proteins. Am J Physiol 265: F461**

Pubmed: [Author and Title](#)

Google Scholar: [Author Only](#) [Title Only](#) [Author and Title](#)

**Alexandersson E, Danielson JA, Rade J, Moparthi VK, Fontes M, Kjellbom P, Johanson U (2010) Transcriptional regulation of aquaporins in accessions of Arabidopsis in response to drought stress. Plant J 61: 650-660**

Pubmed: [Author and Title](#)

Google Scholar: [Author Only](#) [Title Only](#) [Author and Title](#)

**Alexandersson E, Fraysse L, Sjøvall-Larsen S, Gustavsson S, Fellert M, Karlsson M, Johanson U, Kjellbom P (2005) Whole gene family expression and drought stress regulation of aquaporins. Plant Molecular Biology 59: 469-484**

Pubmed: [Author and Title](#)

Google Scholar: [Author Only](#) [Title Only](#) [Author and Title](#)

**Alonso JM, Stepanova AN, Leisse TJ, Kim CJ, Chen H, Shinn P, Stevenson DK, Zimmerman J, Barajas P, Cheuk R, Gadriab C, Heller C, Jeske A, Koesema E, Meyers CC, Parker H, Prednis L, Ansari Y, Choy N, Deen H, Geralt M, Hazari N, Hom E, Karnes M, Mulholland C, Ndubaku R, Schmidt I, Guzman P, Aguilar-Henonin L, Schmid M, Weigel D, Carter DE, Marchand T, Risseuw E, Brogden D, Zeko A, Crosby WL, Berry CC, Ecker JR (2003) Genome-wide insertional mutagenesis of Arabidopsis thaliana. Science 301: 653-657**

Pubmed: [Author and Title](#)

Google Scholar: [Author Only](#) [Title Only](#) [Author and Title](#)

**Beebo A, Thomas D, Der C, Sanchez L, Leborgne-Castel N, Marty F, Schoefs B, Bouhidel K (2009) Life with and without AtTIP1;1, an Arabidopsis aquaporin preferentially localized in the apposing tonoplasts of adjacent vacuoles. Plant Mol Biol 70: 193-209**

Pubmed: [Author and Title](#)

Google Scholar: [Author Only](#) [Title Only](#) [Author and Title](#)

**Ben Baaziz K, Lopez D, Rabot A, Combes D, Gousset A, Bouzid S, Cochard H, Sakr S, Venisse JS (2012) Light-mediated K-leaf induction and contribution of both the PIP1s and PIP2s aquaporins in five tree species: walnut (Juglans regia) case study. Tree Physiology 32: 423-434**

Pubmed: [Author and Title](#)

Google Scholar: [Author Only](#) [Title Only](#) [Author and Title](#)

**Bernacchi CJ A simple utility for analyzing Photosynthetic-CO2 response curves. Available from: <http://www.life.illinois.edu/bernacchi/links.html>**

**Bernacchi CJ, Singsaas EL, Pimentel C, Portis AR, Long SP (2001) Improved temperature response functions for models of Rubisco-limited photosynthesis. Plant Cell and Environment 24: 253-259**

Pubmed: [Author and Title](#)

Google Scholar: [Author Only](#) [Title Only](#) [Author and Title](#)

**Bertl A, Kaldenhoff R (2007) Function of a separate NH<sub>3</sub>-pore in Aquaporin TIP2;2 from wheat. FEBS Lett 581: 5413-5417**

Pubmed: [Author and Title](#)

Google Scholar: [Author Only](#) [Title Only](#) [Author and Title](#)

**Brooks A, Farquhar GD (1985) Effect of temperature on the CO<sub>2</sub>/O<sub>2</sub> specificity of ribulose-1,5-bisphosphate carboxylase/oxygenase and the rate of respiration in the light : Estimates from gas-exchange measurements on spinach. Planta 165: 397-406**

Pubmed: [Author and Title](#)

Google Scholar: [Author Only](#) [Title Only](#) [Author and Title](#)

**Chaumont F, Barrieu F, Jung R, Chrispeels MJ (2000) Plasma membrane intrinsic proteins from maize cluster in two sequence subgroups with differential aquaporin activity. Plant Physiol 122: 1025-1034**

Pubmed: [Author and Title](#)

Google Scholar: [Author Only](#) [Title Only](#) [Author and Title](#)

**Choi WG, Roberts DM (2007) Arabidopsis NIP2;1, a major intrinsic protein transporter of lactic acid induced by anoxic stress. J Biol Chem 282: 24209-24218**

Pubmed: [Author and Title](#)

Google Scholar: [Author Only](#) [Title Only](#) [Author and Title](#)

**Da Ines O, et al. (2010) Kinetic analyses of plant water relocation using deuterium as tracer – reduced water flux of Arabidopsis pip2 aquaporin knockout mutants. Plant Biology 12: 129-139**

Pubmed: [Author and Title](#)

Google Scholar: [Author Only](#) [Title Only](#) [Author and Title](#)

**Daniels MJ, Mirkov TE, Chrispeels MJ (1994) The plasma membrane of Arabidopsis thaliana contains a mercury-insensitive aquaporin that is a homolog of the tonoplast water channel protein TIP. Plant Physiol 106: 1325-1333**

Pubmed: [Author and Title](#)

Google Scholar: [Author Only](#) [Title Only](#) [Author and Title](#)

**Duursma RA, Blackman CJ, Lopez R, Martin-StPaul NK, Cochard H, Medlyn BE (2019) On the minimum leaf conductance: its role in models of plant water use, and ecological and environmental controls. New Phytologist 221: 693-705**

Pubmed: [Author and Title](#)

Google Scholar: [Author Only](#) [Title Only](#) [Author and Title](#)

**Dynowski M, Schaaf G, Loque D, Moran O, Ludewig U (2008) Plant plasma membrane water channels conduct the signalling molecule H<sub>2</sub>O<sub>2</sub>. *Biochem J* 414: 53-61**

Pubmed: [Author and Title](#)

Google Scholar: [Author Only](#) [Title Only](#) [Author and Title](#)

**Fetter K, Van Wilder V, Moshelion M, Chaumont F (2004) Interactions between plasma membrane aquaporins modulate their water channel activity. *Plant Cell* 16: 215-228**

Pubmed: [Author and Title](#)

Google Scholar: [Author Only](#) [Title Only](#) [Author and Title](#)

**Flexas J, Diaz-Espejo A, Berry JA, Cifre J, Galmes J, Kaldenhoff R, Medrano H, Ribas-Carbo M (2007) Analysis of leakage in IRGA's leaf chambers of open gas exchange systems: quantification and its effects in photosynthesis parameterization. *J Exp Bot* 58: 1533-1543**

Pubmed: [Author and Title](#)

Google Scholar: [Author Only](#) [Title Only](#) [Author and Title](#)

**Flexas J, Ortuno MF, Ribas-Carbo M, Diaz-Espejo A, Florez-Sarasa ID, Medrano H (2007) Mesophyll conductance to CO<sub>2</sub> in *Arabidopsis thaliana*. *New Phytol* 175: 501-511**

Pubmed: [Author and Title](#)

Google Scholar: [Author Only](#) [Title Only](#) [Author and Title](#)

**Fraysse LC, Wells B, McCann MC, Kjellbom P (2005) Specific plasma membrane aquaporins of the PIP1 subfamily are expressed in sieve elements and guard cells. *Biol Cell* 97: 519-534**

Pubmed: [Author and Title](#)

Google Scholar: [Author Only](#) [Title Only](#) [Author and Title](#)

**Gambetta GA, Fei J, Rost TL, Knipfer T, Matthews MA, Shackel KA, Walker MA, McElrone AJ (2013) Water uptake along the length of grapevine fine roots: developmental anatomy, tissue-specific aquaporin expression, and pathways of water transport. *Plant Physiol* 163: 1254-1265**

Pubmed: [Author and Title](#)

Google Scholar: [Author Only](#) [Title Only](#) [Author and Title](#)

**Hachez C, Laloux T, Reinhardt H, Cavez D, Degand H, Grefen C, De Rycke R, Inze D, Blatt MR, Russinova E, Chaumont F (2014) *Arabidopsis* SNAREs SYP61 and SYP121 Coordinate the Trafficking of Plasma Membrane Aquaporin PIP2;7 to Modulate the Cell Membrane Water Permeability. *Plant Cell* 26: 3132-3147**

Pubmed: [Author and Title](#)

Google Scholar: [Author Only](#) [Title Only](#) [Author and Title](#)

**Harley PC, Loreto F, Di Marco G, Sharkey TD (1992) Theoretical Considerations when Estimating the Mesophyll Conductance to CO<sub>2</sub> Flux by Analysis of the Response of Photosynthesis to CO<sub>2</sub>. *Plant Physiol* 98: 1429-1436**

Pubmed: [Author and Title](#)

Google Scholar: [Author Only](#) [Title Only](#) [Author and Title](#)

**Heckwolf M, Pater D, Hanson DT, Kaldenhoff R (2011) The *Arabidopsis thaliana* aquaporin AtPIP1;2 is a physiologically relevant CO<sub>2</sub> transport facilitator. *Plant Journal* 67: 795-804**

Pubmed: [Author and Title](#)

Google Scholar: [Author Only](#) [Title Only](#) [Author and Title](#)

**Hooijmaijers C, Rhee JY, Kwak KJ, Chung GC, Horie T, Katsuhara M, Kang H (2012) Hydrogen peroxide permeability of plasma membrane aquaporins of *Arabidopsis thaliana*. *Journal of Plant Research* 125: 147-153**

Pubmed: [Author and Title](#)

Google Scholar: [Author Only](#) [Title Only](#) [Author and Title](#)

**Ishikawa F, Suga S, Uemura T, Sato MH, Maeshima M (2005) Novel type aquaporin SIPs are mainly localized to the ER membrane and show cell-specific expression in *Arabidopsis thaliana*. *FEBS Lett* 579: 5814-5820**

Pubmed: [Author and Title](#)

Google Scholar: [Author Only](#) [Title Only](#) [Author and Title](#)

**Jang JY, Kim DG, Kim YO, Kim JS, Kang H (2004) An expression analysis of a gene family encoding plasma membrane aquaporins in response to abiotic stresses in *Arabidopsis thaliana*. *Plant Mol Biol* 54: 713-725**

Pubmed: [Author and Title](#)

Google Scholar: [Author Only](#) [Title Only](#) [Author and Title](#)

**Javot H, Lauvergeat V, Santoni V, Martin-Laurent F, Guclu J, Vinh J, Heyes J, Franck KI, Schaffner AR, Bouchez D, Maurel C (2003) Role of a single aquaporin isoform in root water uptake. *Plant Cell* 15: 509-522**

Pubmed: [Author and Title](#)

Google Scholar: [Author Only](#) [Title Only](#) [Author and Title](#)

**Johanson U, Karlsson M, Johansson I, Gustavsson S, Sjovall S, Fraysse L, Weig AR, Kjellbom P (2001) The complete set of genes encoding major intrinsic proteins in *Arabidopsis* provides a framework for a new nomenclature for major intrinsic proteins in plants. *Plant Physiol* 126: 1358-1369**

Pubmed: [Author and Title](#)

Google Scholar: [Author Only](#) [Title Only](#) [Author and Title](#)

**Kaldenhoff R, Grote K, Zhu JJ, Zimmermann U (1998) Significance of plasmalemma aquaporins for water-transport in Arabidopsis thaliana. Plant Journal 14: 121-128**

Pubmed: [Author and Title](#)

Google Scholar: [Author Only](#) [Title Only](#) [Author and Title](#)

**Kaldenhoff R, Kolling A, Meyers J, Karmann U, Ruppel G, Richter G (1995) The Blue Light-Responsive Athh2 Gene of Arabidopsis-Thaliana Is Primarily Expressed in Expanding as Well as in Differentiating Cells and Encodes a Putative Channel Protein of the Plasmalemma. Plant Journal 7: 87-95**

Pubmed: [Author and Title](#)

Google Scholar: [Author Only](#) [Title Only](#) [Author and Title](#)

**Kammerloher W, Fischer U, Piechottka GP, Schaffner AR (1994) Water channels in the plant plasma membrane cloned by immunoselection from a mammalian expression system. Plant J 6: 187-199**

Pubmed: [Author and Title](#)

Google Scholar: [Author Only](#) [Title Only](#) [Author and Title](#)

**Laisk AK (1977) Kinetics of photosynthesis and photorespiration in C3-plants. Nauka, Moscow**

Pubmed: [Author and Title](#)

Google Scholar: [Author Only](#) [Title Only](#) [Author and Title](#)

**Lee SH, Chung GC, Jang JY, Ahn SJ, Zwiazek JJ (2012) Overexpression of PIP2;5 aquaporin alleviates effects of low root temperature on cell hydraulic conductivity and growth in Arabidopsis. Plant Physiol 159: 479-488**

Pubmed: [Author and Title](#)

Google Scholar: [Author Only](#) [Title Only](#) [Author and Title](#)

**Lee SH, Zwiazek JJ (2015) Regulation of aquaporin-mediated water transport in Arabidopsis roots exposed to NaCl. Plant Cell Physiol 56: 750-758**

Pubmed: [Author and Title](#)

Google Scholar: [Author Only](#) [Title Only](#) [Author and Title](#)

**Li L, Wang H, Gago J, Cui H, Qian Z, Kodama N, Ji H, Tian S, Shen D, Chen Y, Sun F, Xia Z, Ye Q, Sun W, Flexas J, Dong H (2015) Harpin Hpa1 Interacts with Aquaporin PIP1;4 to Promote the Substrate Transport and Photosynthesis in Arabidopsis. Sci Rep 5: 17207**

Pubmed: [Author and Title](#)

Google Scholar: [Author Only](#) [Title Only](#) [Author and Title](#)

**Maurel C, Reizer J, Schroeder JI, Chrispeels MJ (1993) The vacuolar membrane protein gamma-TIP creates water specific channels in Xenopus oocytes. EMBO J 12: 2241-2247**

Pubmed: [Author and Title](#)

Google Scholar: [Author Only](#) [Title Only](#) [Author and Title](#)

**Mizutani M, Watanabe S, Nakagawa T, Maeshima M (2006) Aquaporin NIP2;1 is mainly localized to the ER membrane and shows root-specific accumulation in Arabidopsis thaliana. Plant Cell Physiol 47: 1420-1426**

Pubmed: [Author and Title](#)

Google Scholar: [Author Only](#) [Title Only](#) [Author and Title](#)

**Otto B, Uehlein N, Sdorra S, Fischer M, Ayaz M, Belastegui-Macadam X, Heckwolf M, Lachnit M, Pede N, Priem N, Reinhard A, Siegfart S, Urban M, Kaldenhoff R (2010) Aquaporin Tetramer Composition Modifies the Function of Tobacco Aquaporins. Journal of Biological Chemistry 285: 31253-31260**

Pubmed: [Author and Title](#)

Google Scholar: [Author Only](#) [Title Only](#) [Author and Title](#)

**Pearcy RW, Ehleringer J, Mooney HA, Rundel PW (1989) Plant Physiological Ecology: Field Methods and Instrumentation. Kluwer, Dordrecht, the Netherlands**

Pubmed: [Author and Title](#)

Google Scholar: [Author Only](#) [Title Only](#) [Author and Title](#)

**Sack LS (2010) Minimum epidermal conductance (gmin, a.k.a. cuticular conductance). Available from: <http://prometheuswiki.org/tiki-index.php?page=Minimum+epidermal+conductance+%28gmin%2C+a.k.a.+cuticular+conductance%29&highlight=conductance>**

Pubmed: [Author and Title](#)

Google Scholar: [Author Only](#) [Title Only](#) [Author and Title](#)

**Walker BJ, Ort DR (2015) Improved method for measuring the apparent CO2 photocompensation point resolves the impact of multiple internal conductances to CO2 to net gas exchange. Plant Cell Environ 38: 2462-2474**

Pubmed: [Author and Title](#)

Google Scholar: [Author Only](#) [Title Only](#) [Author and Title](#)

**Wallace IS, Roberts DM (2004) Homology modeling of representative subfamilies of Arabidopsis major intrinsic proteins. Classification based on the aromatic/arginine selectivity filter. Plant Physiology 135: 1059-1068**

Pubmed: [Author and Title](#)

Google Scholar: [Author Only](#) [Title Only](#) [Author and Title](#)

**Wang C, Hu H, Qin X, Zeise B, Xu D, Rappel WJ, Boron WF, Schroeder JI (2016) Reconstitution of CO2 Regulation of SLAC1 Anion Channel and Function of CO2-Permeable PIP2;1 Aquaporin as CARBONIC ANHYDRASE4 Interactor. Plant Cell 28: 568-582**

Pubmed: [Author and Title](#)

Google Scholar: [Author Only](#) [Title Only](#) [Author and Title](#)

**Wang F (2016) SIOX plugin in ImageJ: area measurement made easy. UV4 Plants Bulletin 2016: 37-44**

Pubmed: [Author and Title](#)

Google Scholar: [Author Only](#) [Title Only](#) [Author and Title](#)

**Warren CR (2008) Soil water deficits decrease the internal conductance to CO<sub>2</sub> transfer but atmospheric water deficits do not. J Exp Bot 59: 327-334**

Pubmed: [Author and Title](#)

Google Scholar: [Author Only](#) [Title Only](#) [Author and Title](#)

**Warren CR (2008) Stand aside stomata, another actor deserves centre stage: the forgotten role of the internal conductance to CO<sub>2</sub> transfer. Journal of Experimental Botany 59: 1475-1487**

Pubmed: [Author and Title](#)

Google Scholar: [Author Only](#) [Title Only](#) [Author and Title](#)

**Warren CR, Dreyer E (2006) Temperature response of photosynthesis and internal conductance to CO<sub>2</sub>: results from two independent approaches. Journal of Experimental Botany 57: 3057-3067**

Pubmed: [Author and Title](#)

Google Scholar: [Author Only](#) [Title Only](#) [Author and Title](#)

**Warren CR, Livingston NJ, Turpin DH (2004) Water stress decreases the transfer conductance of Douglas-fir (*Pseudotsuga menziesii*) seedlings. Tree Physiol 24: 971-979**

Pubmed: [Author and Title](#)

Google Scholar: [Author Only](#) [Title Only](#) [Author and Title](#)

**Wood SN (2017b) mgcv: Mixed gam computation vehicle with automatic smoothness estimation.**

**Zelazny E, Borst JW, Muylaert M, Batoko H, Hemminga MA, Chaumont F (2007) FRET imaging in living maize cells reveals that plasma membrane aquaporins interact to regulate their subcellular localization. Proceedings of the National Academy of Sciences of the United States of America 104: 12359-12364**

Pubmed: [Author and Title](#)

Google Scholar: [Author Only](#) [Title Only](#) [Author and Title](#)

**Zwiazek JJ, Xu H, Tan XF, Navarro-Rodenas A, Morte A (2017) Significance of oxygen transport through aquaporins. Scientific Reports 7**

Pubmed: [Author and Title](#)

Google Scholar: [Author Only](#) [Title Only](#) [Author and Title](#)
